# Supplementary material for: Treatment for paediatric chronic fatigue syndrome or myalgic encephalomyelitis (CFS/ME) and comorbid depression: a systematic review
Source: PubMed Central journal article supplement — BMJ Open. 2016 Oct 11;6(10):e012271. doi: 10.1136/bmjopen-2016-012271 (PMC5073581; doi:10.1136/bmjopen-2016-012271), 2016-10-11
Supplement: bmjopen-2016-012271supp.pdf [file bmjopen-2016-012271supp.pdf]

## Systematic Review of Depression in Paediatric CFS/ME

### *Search terms*

#### 1. Paediatric

(adolesc\* or preadolesc\* or pre-adolesc\* or boy\* or girl\* or child\* or infan\* or preschool\* or pre-school\* or juvenil\* or minor\* or pe?diatri\* or pubescen\* or pre-pubescen\* or prepubescen\* or puberty or teen\* or young\* or youth\* or school\* or high-school\* or highschool\* or sibling\* or schoolchild\* or school child\* or children).tw.

exp Adolescent/ or exp Child/ or exp Child, Preschool/ or exp Infant/ or exp Minors/ or exp Pediatric/

#### 2. CFS/ME

Chronic Fatigue Syndrome.tw

myalgic encephal\*.tw.

chronic fatigue syndrome\*.mp.

exp Fatigue Syndrome, Chronic/

myalgic encephal\*.mp.

#### 3. Depression

depressive disorder/

exp depression/

depress\*.tw

dysthymi\*.tw

exp adjustment disorders/

adjustment disorder\*

low mood.tw.
